# Supplementary material for: Creating a locally crowded environment with nanoclay hydrogels for cell-free biosynthesis
Source: Royal Society of Chemistry journal article supplement (doi:10.1039/d0sm00636j), 2020-01-01
Supplement: d0sm00636j1.pdf [file d0sm00636j1.pdf]

## **Supplementary materials**

### **Creating locally crowded environment with nanoclay hydrogel for cell-free biosynthesis**

Xinjie Chen<sup>1,#</sup>, Qi Sun<sup>1,#</sup>, and Yuan Lu<sup>1,\*</sup>

<sup>1</sup>Key Laboratory of Industrial Biocatalysis, Ministry of Education, Department of Chemical Engineering, Tsinghua University, Beijing 100084, China.

<sup>#</sup>These authors contributed equally to this work.

<sup>\*</sup>Corresponding author. Email: yuanlu@tsinghua.edu.cn (Y. L.).

**Supplementary Table S1. Composition of plasmid labeling system**

| Components                    | Reaction system (50 $\mu$ L) |
|-------------------------------|------------------------------|
| 10 $\times$ Labeling Buffer A | 5 $\mu$ L                    |
| 1 mg/mL DNA template          | 5 $\mu$ L                    |
| Label IT®Tracker Reagent      | 2.5 $\mu$ L                  |
| ddH <sub>2</sub> O            | 37.5 $\mu$ L                 |

**Supplementary Table S2. Quantitative real-time PCR reaction components**

| Components                           | Reaction system (20 $\mu$ L) |
|--------------------------------------|------------------------------|
| Forward primer (10 $\mu$ M)          | 0.4 $\mu$ L                  |
| Reverse primer (10 $\mu$ M)          | 0.4 $\mu$ L                  |
| 2 $\times$ TransStart Top Green QPCR |                              |
| SuperMix                             | 10 $\mu$ L                   |
| Passive Reference Dye (50 $\times$ ) | 0.4 $\mu$ L                  |
| Nuclease-free Water                  | 4 $\mu$ L                    |
| DNA template                         | 4.8 $\mu$ L                  |

**Supplementary Table S3. Quantitative real-time PCR reaction system**

| Steps        | Temperature | Time |
|--------------|-------------|------|
| Stage1       | 94℃         | 30 s |
|              | 94℃         | 5 s  |
| Stage2 (40×) | 57℃         | 15 s |
|              | 72℃         | 31 s |
|              | 95℃         | 15 s |
| Stage3       | 60℃         | 60 s |
|              | 95℃         | 15 s |

**Supplementary Table S4. List of nanoclay solution concentration and CaCl<sub>2</sub> solution concentration**

| Nanoclay solution (mg/mL) | CaCl <sub>2</sub> solution (mM) |
|---------------------------|---------------------------------|
| 2                         | 10                              |
| 4                         | 20                              |
| 6                         | 30                              |
| 8                         | 40                              |
| 10                        | 50                              |
| 12                        | 60                              |
| 14                        | 70                              |
| 16                        | 80                              |
| 18                        | 90                              |
| 20                        | 100                             |

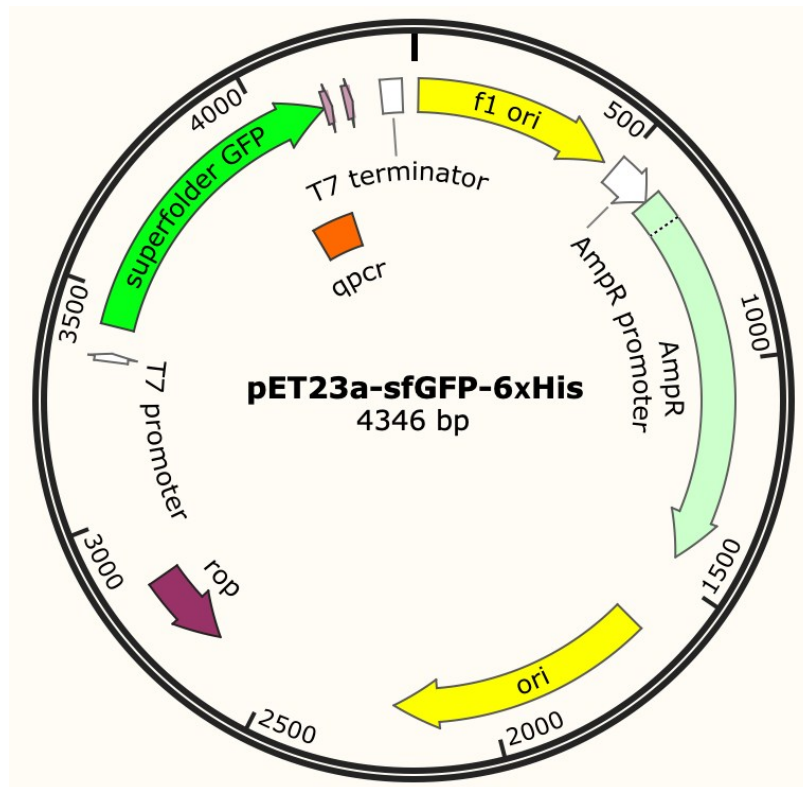

T7 promoter-sfGFP-6xHis-T7 terminator

TAATACGACTCACTATAGG GAGACCACAACGGTTTCCCTCTAGAAATAAT  
TTTGTTTAACTTTAAGAAGGAGATATACAT ATGCGTAAAGGCGAAGAGCT  
GTTCACTGGTGTTCGTCCTATTCTGGTGGAACTGGATGGTGTATGTCAACGG  
TCATAAGTTTTCCGTGCGTGGCGAGGGTGAAGGTGACGCAACTAATGGTA  
AACTGACGCTGAAGTTCATCTGTACTACTGGTAAACTGCCGGTACCTTGGC  
CGACTCTGGTAACGACGCTGACTTATGGTGTTCAGTGCTTTGCTCGTTATC  
CGGACCATATGAAGCAGCATGACTTCTTCAAGTCCGCCATGCCGGAAGGC  
TATGTGCAGGAACGCACGATTTCTTTAAGGATGACGGCACGTACAAAAC  
GCGTGCGGAAGTGAAATTTGAAGGCGATACCCTGGTAAACCGCATTGAGC  
TGAAAGGCATTGACTTTAAAGAAGACGGCAATATCCTGGGCCATAAGCTG  
GAATACAATTTTAACAGCCACAATGTTTACATCACCGCCGATAAACAAAA  
AAATGGCATTAAAGCGAATTTTAAATTCGCCACAACGTGGAGGATGGCA  
GCGTGACGCTGGCTGATCACTACCAGCAAAACACTCCAATCGGTGATGGT  
CCTGTTCTGCTGCCAGACAATCACTATCTGAGCACGCAAAGCGTTCTGTCT  
AAAGATCCGAACGAGAAACGCGATCATATGGTTCTGCTGGAGTTCGTAAC  
CGCAGCGGGCATCACGCATGGTATGGATGAACTGTACAAA CATCACCATC  
ACCATCATTAAGTCGACAAGCTTGCGGCCGCACTCGAG CACCACCACCAC  
CACCAC TGAGATCCGGCTGCTAACAAAGCCCGAAAGGAAGCTGAGTTGGC  
TGCTGCCACCGCTGAGCAATAA CTAGCATAACCCCTTGGGGCCTCTAAAC  
GGGTCTTGAGGGGTTTTTG

**Supplementary Figure S1. The pET23a-sfGFP-6\242\252His plasmid map and the sequence information.** The sfGFP was regulated under the bacteriophage derived T7 promoter and terminator in the pET-23a backbone. The last 150 bps of sfGFP were designed for the qPCR (Real-time Quantitative PCR).

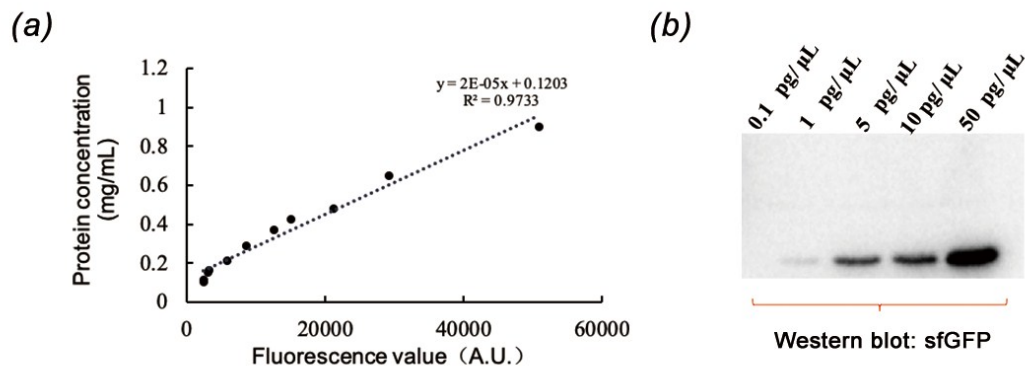

**Supplementary Figure S2. Fluorescence value could represent the protein expression level.** (a) Standard curve of sfGFP. The fluorescence value of sfGFP increased linearly with the concentration of protein, which indicated that the protein expression level could be characterized by the fluorescence, and the influence of the environment could be ignored. (b) The results of Western blot. The gray-scale value increased linearly with the concentration of protein.

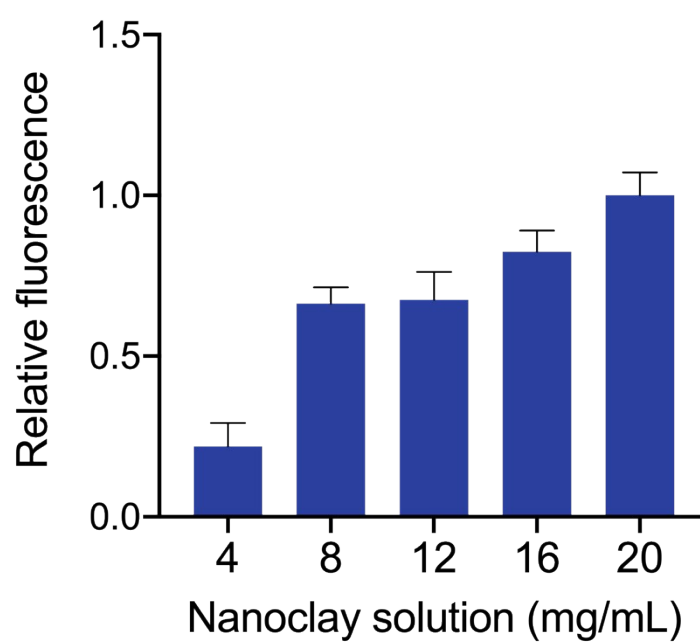

**Supplementary Figure S3. The protein expression level with different concentrations of nanoclay solution.** When the nanoclay solution concentration was 20 mg/mL, the fluorescence of sfGFP was set to 1.
